# Supplementary material
Source: Royal Society of Chemistry journal article supplement (doi:10.1039/d5ma01315a)
Supplement: d5ma01315a1.pdf [file d5ma01315a1.pdf]

## Capturing Sulfur: A comparative study on sulfur infiltration techniques of carbon aerogels and novel methods for microstructural analysis

Marina Schwan<sup>1</sup>, Jessica Kröner<sup>1</sup>, Henrike Niehoff<sup>2</sup>, Peter Wagner<sup>2</sup>, Barbara Milow<sup>1</sup>

<sup>1</sup>Institute for Frontier Materials on Earth and in Space, German Aerospace Center (DLR), Linder Hoehe, 51147 Cologne, Germany

<sup>2</sup>Institute of Engineering Thermodynamics, German Aerospace Center (DLR), Carl von Ossietzky Str. 15, 26129 Oldenburg, Germany

### Supporting information

**Table S1:** Specific surface area, C constant and correlation coefficient from nitrogen isotherms

| Sample                 | $S_{\text{BET}}$ , [m <sup>2</sup> /g] | C constant | Correlation coefficient $R^2$ |
|------------------------|----------------------------------------|------------|-------------------------------|
| CA <sub>a</sub>        | 827±21                                 | 2,906      | 0.99999                       |
| CA <sub>ad</sub>       | 2440±110                               | 223        | 0.99999                       |
| CA <sub>a, 600°C</sub> | 740±64                                 | 2,916      | 0.99999                       |
| CA <sub>a, MW</sub>    | 761±17                                 | 2,993      | 0.99999                       |

The specific surface area was determined using the multi-point Brunauer-Emmett-Teller (BET) method. The calculation was performed in the relative pressure range of 0.05 to 0.13 using MicroActive Version 7.00 software.

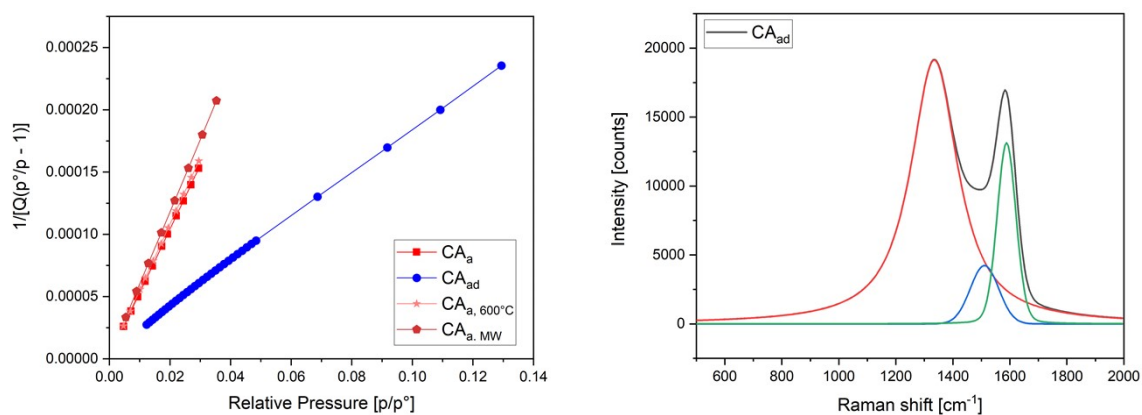

**Figure S1:** a) Rouquerol BET fits at relative pressure 0.01 to 0.13; b) Raman spectra of CA<sub>ad</sub> with fits

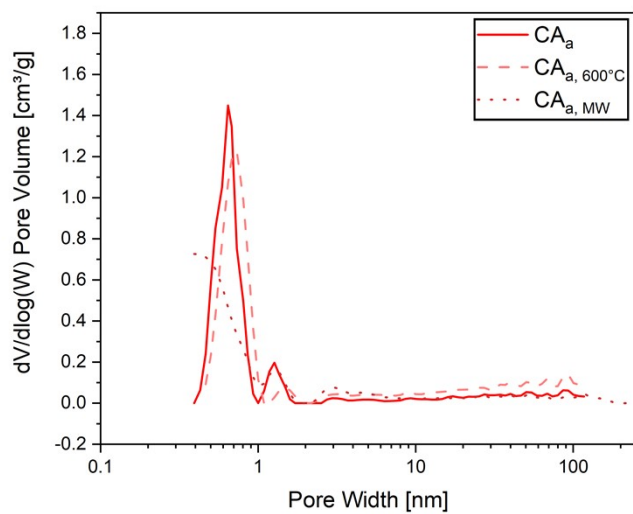

Figure S2: Pore size distribution of pure  $CA_a$  and of  $CA_a$  after different treatments

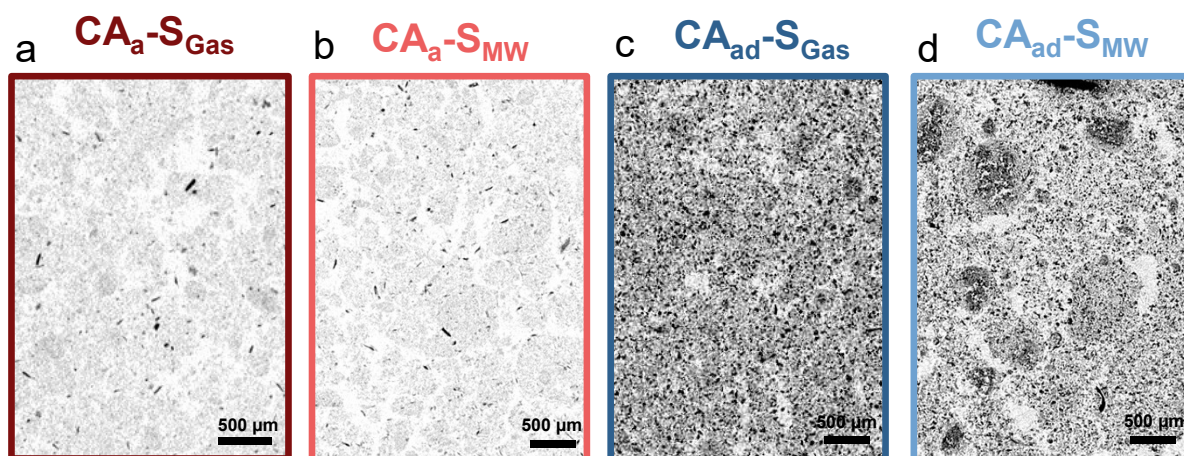

Figure S3: Reconstructed cross-sectional images of the analyzed carbon sulfur aerogels. In this depiction, material with a higher density appears darker in the images.

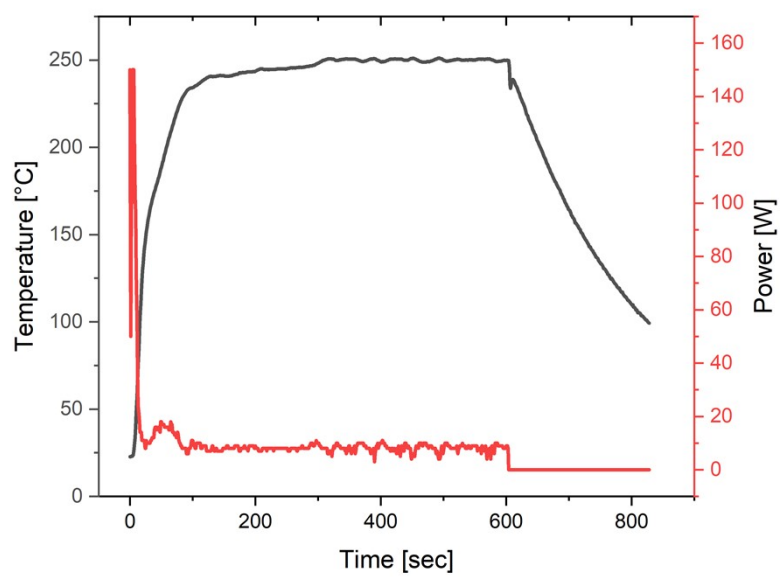

**Figure S4: The power – temperature plots during microwave treatment**
